## 1 **DRB1 as a mediator between transcription and microRNA processing**

2 Dawid Bielewicz\*, Jakub Dolata, Mateusz Bajczyk, Lukasz Szewc, Tomasz Gulanicz, Susheel  
3 Sagar Bhat, Anna Karlik, Artur Jarmolowski and Zofia Szweykowska-Kulinska

4 Department of Gene Expression, Institute of Molecular Biology and Biotechnology, Faculty of  
5 Biology, Adam Mickiewicz University, Poznan, Poland

6 \*Corresponding author: [bieda@amu.edu.pl](mailto:bieda@amu.edu.pl)

### 7 **Abstract**

8 DRB1 (HYL1) is a double-stranded RNA binding protein involved in miRNA processing in plants.  
9 It is a core component of the Microprocessor complex and enhances the efficiency and  
10 precision of miRNA processing by DCL1 protein. In this work, we report a novel function of  
11 DRB1 protein in the transcription of *MIR* genes. DRB1 co-localizes with RNA Polymerase II and  
12 affects its distribution along *MIR* genes. Moreover, proteomic experiments revealed that  
13 DRB1 protein interacts with many transcription factors. Finally, we show that the action of  
14 DRB1 is not limited to *MIR* genes as it impacts expression of many other genes, majority of  
15 which are involved in plant response to light. These discoveries add DRB1 as another player  
16 of gene regulation at transcriptional level, independent of its role in miRNA biogenesis.

### 17 **Key words**

18 DRB1, HYL1, Microprocessor, microRNA, transcription, RNA Pol II

### 19 **Introduction**

20 MicroRNAs (miRNAs) are small ~21nt RNA molecules that play vital role in post-transcriptional  
21 regulation of gene expression (Bartel 2004). miRNAs are involved in a vast range of metabolic  
22 processes and hence act as regulatory molecules in overall plant development, for example in  
23 processes like determination of leaf shape, flowering time and response to environmental  
24 conditions (Palatnik, Allen et al. 2003, Chen 2004, Kruszka, Pieczynski et al. 2012,  
25 Barciszewska-Pacak, Milanowska et al. 2015). miRNA genes (*MIR*) are transcribed by RNA Pol  
26 II (Xie, Allen et al. 2005) and the primary transcripts (known as primary-miRNAs; pri-miRNAs)  
27 contain a stem-loop region. The pri-miRNAs are then cleaved to release mature miRNAs by  
28 a complex of enzymes known as the Microprocessor. Notably, the stem-loop region of pri-  
29 miRNAs serves as a mark for the Microprocessor to recognize and start processing the pri-  
30 miRNAs (Kurihara and Watanabe 2004, Dolata, Taube et al. 2018). Microprocessor is

31 a complex of three core proteins, Dicer Like 1 (DCL1), Double-stranded RNA Binding protein 1  
32 (DRB1) (also known as Hyponastic Leaves 1 (HYL1)) and Serrate (SE) (Yang, Liu et al. 2006,  
33 Fang and Spector 2007, Dong, Han et al. 2008, Dolata, Taube et al. 2018). DCL1 is a RNase III  
34 type enzyme that cuts and releases miRNA/miRNA\* from pri-miRNAs in a two-step reaction  
35 (Park, Li et al. 2002, Reinhart, Weinstein et al. 2002). DRB1 and SE assist and increase the  
36 accuracy of pri-miRNA cleavage by DCL1 (Kurihara, Takashi et al. 2006). All three of these core  
37 components are necessary for proper functioning of Microprocessor and in mutants of any of  
38 these proteins, pri-miRNAs accumulate and mature miRNAs are downregulated (Laubinger,  
39 Sachsenberg et al. 2008, Szarzynska, Sobkowiak et al. 2009, Zielesinski, Dolata et al. 2015).  
40 Two modes of Microprocessor mediated pri-miRNA cleavage have been described: base to  
41 loop (first cut at the base, second closer to the loop structure) and loop to base (first cut in  
42 the loop and second closer to the base), depending on the directionality of DCL1 cleavage  
43 (Kurihara and Watanabe 2004, Bologna, Mateos et al. 2009).

44 DRB1, a double stranded RNA binding protein, contains two double stranded RNA binding  
45 domains (dsRBDs) in its N-terminal region followed by a nuclear localization signal (NLS) and  
46 an unstructured C-terminal region (Yang, Chen et al. 2010). DRB1 is considered to form  
47 a homodimer and bind the miRNA/miRNA\* duplex region of pri-miRNA (Burdisso, Milia et al.  
48 2014, Yang, Ren et al. 2014). DRB1 knockout has a pleiotropic impact on the phenotype of  
49 plants (among the others defects in leaf shape and late flowering time) and their response to  
50 auxin and ABA (Lu and Fedoroff 2000, Vazquez, Gascioli et al. 2004). So far, no ortholog of  
51 DRB1 has been identified in mammalian cells. However, similar to plants, mammalian RNA  
52 nucleases (Drosha and Dicer) also require proteins containing dsRBDs: DiGeorge syndrome  
53 critical region 8 (DGCR8) and transactivation response element RNA-binding protein (TRPB),  
54 for proper functioning (Han, Lee et al. 2004, Chendrimada, Gregory et al. 2005, Haase,  
55 Jaskiewicz et al. 2005). Both, DRB1 and DGCR8 are nuclear proteins involved in first step of  
56 pri-miRNA maturation i.e. cleavage by RNase III (Gregory, Yan et al. 2004). However, like TRBP,  
57 DRB1 can be phosphorylated which affects its activity (Paroo, Ye et al. 2009, Manavella,  
58 Hagmann et al. 2012, Achkar, Cho et al. 2018).

59 miRNA production in mammalian cells is co-transcriptional as Drosha and DGCR8 have been  
60 shown to bind regions in the proximity of many gene promoters (not just *MIR* genes) and  
61 consequently Drosha knockdown in HeLa cells negatively impacts gene transcription (Gromak,  
62 Dienstbier et al. 2013). Similarly, in plants, co-transcriptional processing of plant pri-miRNAs

63 has been proposed through the association of DCL1 with the chromatin and Elongator  
64 complex (Fang, Cui et al. 2015). However, presence of pri-miRNA transcripts is necessary for  
65 the association of DCL1 with chromatin. Since the interaction between DCL1 and DRB1 has  
66 been established, here we ask whether it possible that DRB1 is also involved in the  
67 transcription of *MIR* genes?

## 68 **Results**

### 69 **DRB1 is a positive regulator of *MIR* gene transcription.**

70 To investigate the possibility that DRB1 protein is involved in the transcription of *MIR* genes  
71 we used a GUS reporter line system. We independently crossed two reporter lines with GUS  
72 under two different *MIR* gene promoters (p*MIR393A*:GUS and p*MIR393B*:GUS (Parry,  
73 Calderon-Villalobos et al. 2009)) in the wild type (Col-0) background with *hyl1-2* mutants  
74 (DRB1 knockout mutants). We observed that the expression of GUS protein driven by *MIR*  
75 gene promoter was remarkably lower in *hyl1-2* background as compared to Col-0 (Fig. 1A). We  
76 measured the level of GUS transcripts in p*MIR393A*:GUS, p*MIR393B*:GUS,  
77 p*MIR392A*:GUS*hyl1-2*, and p*MIR392B*:GUS*hyl1-2* reporter lines using RT-qPCR and  
78 observed a significant decrease in the level of GUS transcripts in p*MIR392A*:GUS*hyl1-2*, and  
79 p*MIR392B*:GUS*hyl1-2* plants. Additionally, we also tested the levels of pri-miRNA393A and  
80 pri-miRNA393B in the obtained lines and as expected, these pri-miRNAs were upregulated in  
81 the *hyl1-2* mutant background (Fig. 1B). These data indicate that DRB1 which is involved in  
82 pri-miRNA processing may also regulate the transcription of *MIR* genes. However, it is also  
83 possible that the strong downregulation of GUS expression in the *hyl1-2* background is caused  
84 by a feedback mechanism in which the global downregulation of miRNAs in *hyl1-2* results in  
85 an upregulation of a yet unidentified transcriptional factor(s) that in turn inhibits *MIR393A*  
86 and *MIR393B* transcription. To address this question, we decided to restore the miRNA levels  
87 in the reporter lines within *hyl1-2* background. For this purpose we crossed these lines with a  
88 *DCL1* mutant: *dcl1-13* (Tagami, Motose et al. 2009). *dcl1-13* mutant has a point mutation in  
89 the *DCL1* gene which promotes DCL1 activity in absence of DRB1. The point mutation in *DCL1*  
90 gene results in an amino acid substitution of Glu to Lys in the ATPase/DExH-box RNA helicase  
91 domain. Hence, the expression of *dcl1-13* allele in the *hyl1-2* background restores the level of  
92 miRNAs and rescues plants from the developmental abnormalities associated with lower level  
93 of miRNAs. We prepared a *hyl1-2/dcl1-13* transgenic line carrying genomic sequence of

94 mutated *DCL1* gene under its native promoter. We obtained four independent transgenic lines  
95 and confirmed previous results showing that the expression of *dcl1-13* allele restores the  
96 levels of pri-miRNAs and mature miRNAs in *hyl1-2* background (Fig. S1). We then crossed our  
97 reporter lines with *hyl1-2/dcl1-13* transgenic plants. Analysis of GUS staining in the offspring  
98 clearly showed that GUS protein is still inefficiently expressed in the *hyl1-2/dcl1-13* mutant  
99 background (FIG. 1A, right panel). Additionally, we also performed RT-qPCR analysis to  
100 measure the GUS transcript level and like in *hyl1-2* mutant, in *hyl1-2/dcl1-13* mutant plants,  
101 GUS transcript was downregulated in comparison to wild type plants (FIG. 1B, right panel).  
102 Hence, our data shows that DRB1 is a direct positive regulator of *MIR* gene transcription.

### 103 **DRB1 colocalizes with RNA polymerase II**

104 The observation that DRB1 is required for a proper transcription of *MIR393A* and *MIR393B*  
105 prompted us to test the stage at which it affects transcription. We tested the co-localization  
106 of DRB1 with RNA Pol II at different stages of transcription. We performed immunolocalization  
107 in fixed nuclei from wild type plants and observed strong colocalization of DRB1 and total RNA  
108 Pol II (Fig. 2). We used antibodies specific for Serine5 (transcription initiation) and Serine2  
109 (transcription elongation) of RNA Pol II C-terminal domain (CTD) independently to further  
110 characterize the nature of these interactions. The results showed that DRB1 is associated with  
111 RNA Pol II already at the transcription initiation stage (Ser5) and remains associated with RNA  
112 Pol II during the elongation step (Ser2). Since DRB1 is a part of Microprocessor core complex  
113 we considered the possibility that DRB1 is brought to RNA Pol II by another member of  
114 Microprocessor. Recently it was shown that SE is directly associated with specific regions of  
115 Arabidopsis chromatin (Speth, Szabo et al. 2018). Apart from its role in miRNA biogenesis, SE  
116 is involved in many processes connected with RNA metabolism like splicing, 3'-end formation,  
117 RNA transport and RNA stability (Laubinger, Sachsenberg et al. 2008, Raczynska, Stepien et al.  
118 2014). To exclude the possibility of SE mediating DRB1 and RNA Pol II co-localization, we  
119 investigated the interaction of DRB1 with RNA Pol II in the *se-2* mutant plants. (Fig S2). Similar  
120 to our previous experiment, these results were also obtained for total RNA Pol II and for RNA  
121 Pol II phosphorylated at Ser5 or Ser2. We did not see any decrease in co-localization of DRB1  
122 and RNA Pol II in the absence of SE, thus showing that the association of DRB1 with RNA pol II  
123 is not SE dependent. We also addressed the question whether DRB1 is involved throughout  
124 the whole process of transcription. For this purpose, we performed immunolocalization

125 studies for DRB1 and RNA Pol II using antibodies against DRB1 and antibodies which recognize  
126 RNA Pol II phosphorylated at threonine 4 (Thr4) of its CTD domain (mostly associated with  
127 transcription termination or 3' end processing events) (Hintermair, Heidemann et al. 2012,  
128 Nojima, Rebelo et al. 2018). Our co-localization results showed that DRB1 did not co-localize  
129 with RNA pol II phosphorylated at Thr4 in either wild-type or *se-2* mutant plants. These data  
130 show that DRB1 is involved in transcription process from initiation to elongation, but not at  
131 the termination stage and DRB1's role in transcription stimulation is not mediated by other  
132 proteins, at least not by SE.

### 133 **DRB1 protein interacts with transcription factors**

134 Since we found that DRB1 acts as a positive regulator of *MIR* gene transcription and co-  
135 localizes with RNA Pol II we decided to test whether it also interacts with other known  
136 transcription factors. For this experiment, we used a transgenic line containing DRB1 tagged  
137 with HA epitope (*pDRB1:DRB1:HA*) and anti-HA antibodies to co-immunoprecipitate with its  
138 potential protein interactors which were later identified by Mass Spectrometry analysis.  
139 As a benchmark for our experiment, we searched for previously published data regarding  
140 DRB1 interactors and compared with our data. We were able to identify bona fide DRB1  
141 partners KETCH1 and CDC5 in our data (Fig 3). (Zhang, Xie et al. 2013, Zhang, Guo et al. 2017).  
142 KETCH1 is a karyopherin enabling the transport of DRB1 to nucleus and CDC5 is a MYB-  
143 transcription factor. Interestingly CDC5 was showed to be involved in the transcription of *MIR*  
144 genes (Zhang, Xie et al. 2013). Similar to DRB1 mutant plants, in the CDC5 knockout mutant  
145 the GUS reporter which was under the control of *MIR* gene promoter was downregulated.  
146 However, *cdc5* mutants showed no enrichment in pri-miRNA level, which can be explained  
147 that CDC5 is involved in transcription of *MIR* genes but not in the processing of pri-miRNA like  
148 DRB1 (Vazquez, Gascioli et al. 2004, Zhang, Xie et al. 2013). Interestingly, in our co-IP results  
149 we found that DRB1 was associated also with transcription factors from the Topless  
150 transcription factor family (Fig 3). However, the interaction between Topless transcription  
151 factors and DRB1 requires more detailed investigation.

### 152 **Distribution of RNA polymerase II is affected in *hyl1-2* mutant**

153 In light of our data showing that DRB1 and RNA Pol II co-localize, we tested whether this co-  
154 localization also affects RNA Pol II occupancy on *MIR* genes. For this purpose, we performed  
155 Chromatin Immunoprecipitation (ChIP) using antibody against total RNA Pol II followed by

156 qPCR in wild-type and *hyl1-2* mutants. We compared the occupancy of RNA Pol II on selected  
157 *MIR* genes (~200 bp upstream of transcription initiation start site) in *hyl1-2* and wild-type  
158 plants (Fig. 3B). We selected the *MIR* genes which were tested previously in the *cdc5* mutant  
159 plants (Zhang, Xie et al. 2013). The results showed that RNA Pol II distribution is affected at  
160 several *MIR* genes promoter regions. Our data showed an increased accumulation of RNA Pol  
161 II at the region approximately 200 base pair upstream from the transcription initiation site  
162 (TSS) for few tested *MIR* genes in the *hyl1-2* mutant when compared to wild type plants. This  
163 observation is opposite to what was reported in *cdc5* mutant plants. Additionally, we  
164 examined the RNA Pol II distribution in detail on *MIR393A* and *MIR393B* genes (Fig. 3C). The  
165 higher occupancy of RNA polymerase II in these regions may suggest that, in the *hyl1-2*  
166 mutant: 1) transcription of selected *MIR* genes is more efficient; or 2) transition from  
167 initiation to transcription elongation is deregulated. Keeping in mind our previous results  
168 where transcription of GUS reporter was downregulated in a *hyl1-2* mutant when compared  
169 to wild-type plants we suggest that the accumulation of RNA Pol II on the promoter region of  
170 *MIR* genes in *hyl1-2* is a result of RNA Pol II's inability to transition from initiation to elongation.  
171 Furthermore, we performed ChIP-seq experiments using antibodies against total RNA pol II in  
172 wild-type and *hyl1-2* mutant plants for a global analysis of RNA pol II distribution along *MIR*  
173 genes. For the global ChIP-seq analysis we selected only *MIR* genes which are independent  
174 transcriptional units with determined TSS (Bielewicz, Dolata et al. 2012, Zielezinski, Dolata et  
175 al. 2015). Results clearly show increased RNA Pol II occupancy in the region of TSS as well as  
176 in the gene body of *MIR* genes in *hyl1-2* mutant in comparison to wild-type plants (Fig. 3D).  
177 ChIP-seq data also confirmed the results obtained for *MIR393A* gene (Fig. S3A). Our data  
178 suggests that DRB1 acts a positive factor for RNA Pol II to transition through initiation to  
179 elongation.

#### 180 **Knockdown of DRB1 affects gene expression of many genes.**

181 We were interested whether DRB1 could also affect transcription of other genes transcribed  
182 by RNA Pol II. To investigate this possibility, we analyzed publicly available transcriptomic data  
183 obtained from wild-type and *hyl1-2* mutant plants. Theoretically, in *hyl1-2* mutant, a generally  
184 low level of miRNAs should be accompanied by a general upregulation of miRNA targets. On  
185 the contrary, we noticed that approximately half (1531 genes) of differentially expressed  
186 genes (DEGs) (3036 genes) in *hyl1-2* mutants are downregulated as compared to wild-type

187 plants (Fig. 4A). We then compared these results with the transcriptomic data obtained from  
188 *se-3* mutant. Our analysis showed that almost half of the DEGs are common between *se-3*  
189 mutant and *hyl1-2* mutant, indicating that the functions of DRB1 and SE proteins overlap (Fig.  
190 4B). Interestingly, there is a big group of DEGs which are specifically downregulated in *hyl1-2*  
191 mutant plants (769 genes). In agreement with our ChIP-seq data, RNA Pol II occupancy (on TSS  
192 and gene body) was markedly increased in genes (not limited to *MIR* genes) whose  
193 transcription was affected only by DRB1 (Fig. 3E). Gene ontology analysis showed that proteins  
194 encoded from these genes localized mostly in chloroplasts (Fig. 4C). Additionally, the biggest  
195 group of genes downregulated in *hyl1-2* mutant is involved in biological processes of ‘plastid  
196 organization’ according to our gene ontology analysis (Fig. S3B). It was known that light is an  
197 important factor for DRB1 maintenance in the cell (Cho, Ben Chaabane et al. 2014). In the  
198 night DRB1 is degraded by yet unidentified protease which results in downregulation of  
199 mature microRNA level. However, our analysis suggests that DRB1 may be involved in plant  
200 response to light independent of its role in the miRNA pathway. Our data regarding the role  
201 of DRB1 outside of miRNA biogenesis is further supported by a recently published work that  
202 uncovered a novel function of DRB1 connected to skotomorphogenesis independent of its role  
203 in miRNA biogenesis (Sacnun, Crespo et al. 2019). Taken together, our data point towards  
204 a role of DRB1, outside of miRNA biogenesis, where it acts as a general transcriptional factor,  
205 though a lot more work needs to be done before we can completely elucidate the mechanism  
206 of transcriptional gene regulation by DRB1.

## 207 **Discussion**

208 The DRB1 protein plays a major role in the processing of pri-miRNAs. But it was also reported  
209 that without DRB1, in case of intron containing *MIR* genes both forms of pri-miRNA (before  
210 and after splicing) accumulate to high levels in *Arabidopsis thaliana* (Szarzynska, Sobkowiak et  
211 al. 2009). Therefore, it seems that DRB1 may have an additional function in microRNA  
212 biogenesis. It appears that the recruitment of DRB1 to the miRNA biogenesis machinery takes  
213 place at the very early stages of pri-miRNA processing, possibly before splicing occurs. For  
214 protein-coding genes, a direct connection between gene transcription and further co- and  
215 post-transcriptional processing of nascent pre-mRNAs has been shown (Bauren and  
216 Wieslander 1994, Li, Wang et al. 2019). It is known that almost all plant *MIR* genes are  
217 transcribed by RNA Pol II (Xie, Allen et al. 2005). In addition, similar to pre-mRNAs, primary

218 transcripts of *MIR* genes also undergo further processing, including cap structure formation,  
219 polyadenylation, splicing and m<sup>6</sup>A methylation. (Xie, Allen et al. 2005, Bielewicz, Kalak et al.  
220 2013, Schwab, Speth et al. 2013, Knop, Stepien et al. 2017, Bhat, Bielewicz et al. 2019).  
221 The results presented in this manuscript show that a GUS reporter under the control of a *MIR*  
222 gene promoter is expressed at a lower level when DRB1 is missing (*hyl1-2* and *hyl1-2/dcl1-13*  
223 background). Moreover, evaluation of the occupancy of RNA Pol II on *MIR* genes in *hyl1-2*  
224 showed an accumulation of total RNA Pol II in the region approximately 200 base pair  
225 upstream of the transcription initiation site. This phenomenon was observed in the cases of  
226 *MIR393A*, *MIR393B*, as well as *MIR159A*, *MIR163*, *MIR166A*, *MIR170* and *MIR775A* in the *hyl1-2*  
227 mutant. While the distribution of RNA Pol II in a variety of complex genomes is correlated  
228 with gene expression, the presence of RNA Pol II at a specific locus does not necessarily  
229 indicate active expression from this locus. The higher occupancy of the RNA polymerase II at  
230 the analyzed *MIR* promoter regions, together with results from the GUS reporter assays,  
231 suggest that transition of transcription from initiation to elongation is impeded in the *hyl1-2*  
232 mutant. This suggestion is supported by the results showing that DRB1 colocalized with total  
233 RNA pol II and also specifically and individually with RNA Pol II phosphorylated at Ser5 and  
234 Ser2. It is known that the phosphorylation status of the CTD domain of RNA Pol II is very  
235 important in transcription (Komarnitsky, Cho et al. 2000) and the interplay between kinases  
236 and phosphatases acting on RNA Pol II can modify gene expression. One of the proteins that  
237 is able to dephosphorylate the CTD of the RNA Pol II at Ser5 residue is a protein phosphatase  
238 called CPL1 (Koiwa, Hausmann et al. 2004). Similarly, it was reported that the phosphorylation  
239 status of DRB1 is also important in microRNA biogenesis (Mendoza, Du et al. 2005, Manavella,  
240 Hagmann et al. 2012, Raghuram, Sheikh et al. 2015, Su, Li et al. 2017, Yan, Wang et al. 2017,  
241 Achkar, Cho et al. 2018). It was shown that the DRB1 protein needs to be dephosphorylated  
242 for its optimal activity and this is also maintained by the CPL1 protein. Fully phosphorylated  
243 DRB1 exclusively localized in the nucleus, is not active in pri-miRNA processing, however this  
244 does not exclude its role in the transcription of *MIR* genes. More importantly, phosphorylation  
245 status of DRB1 could be a factor that distinguishes its role from acting in transcription and  
246 processing of pri-miRNAs. An alternative model suggests that the C-terminal region of DRB1  
247 which displays tendencies to bind dsDNA may interact with chromatin (Bhagat, Verma et al.  
248 2018). Our data presents new possibilities regarding DRB1's role in the plant cell but to put  
249 forward a detailed mechanism of how DRB1 affects transcription more work.



## 250 **Material and methods**

### 251 **Plant material and growth conditions**

252 *Arabidopsis thaliana* ecotype Columbia-0 plants were used as wild-type plants, insertion  
253 mutant SALK\_064863 as knockout of DRB1 (*hyl1-2*) and insertion mutant SAIL\_44\_G12 as se-  
254 2. *pMIR393A:GUS* and *pMIR393B:GUS* reporter lines which were used in this study were  
255 described previously (Parry, Calderon-Villalobos et al. 2009). *hyl1-2/dcl1-13* and  
256 *pDRB1:DRB1:HA* transgenic lines were obtained by floral dip transformation of *hyl1-2* (Clough  
257 and Bent 1998). Genomic sequences of *DCL1* and *DRB1* with around 2kb promoter region were  
258 cloned into pENTR-D-TOPO vector (Invitrogen). Next, site directed mutagenesis was  
259 performed to introduce *DCL1-13* point mutation. Finally, LR reaction was used to subcloned  
260 *DCL1-13* and *DRB1* sequence into pEarlyGate301 plasmid followed by *Agrobacterium*  
261 transformation (Earley, Haag et al. 2006).

262 *Arabidopsis* plants were grown in soil (Jiffy-7 42 mm; Jiffy Products International AS, Stange,  
263 Norway) or on ½-strength MS media with 0.8% agar square plates in growth chambers  
264 (Sanyo/Panasonic, Japan) that had a 16-h day length (150–200  $\mu\text{E}/\text{m}^2\text{s}$ ), a constant  
265 temperature of 22 °C and 70% humidity. Seeds were sterilized before sowing in 10% sodium  
266 hypochlorite in 70% EtOH solution.

### 267 **GUS staining for reporter lines analysis:**

268 14 days old *Arabidopsis* seedlings which were grown in ½ MS medium were incubated in  
269 staining solution containing 1 mM X-Gluc in 100 mM  $\text{Na}_3\text{PO}_4$  (pH 7.2), 0.1% Triton X-100, 5  
270 mM  $\text{K}_3\text{Fe}(\text{CN})_6$  and 5 mM  $\text{K}_4\text{Fe}(\text{CN})_6$  for 24 h at 37°C. Seedlings were then cleared in 70%  
271 ethanol for 2 days and mounted in 50% v/v glycerol before observations. After GUS staining  
272 the pictures were taken using the Leica M60 stereo microscope.

### 273 **RNA isolation, cDNA synthesis and qPCR.**

274 Total RNA from three-week-old or 14-day-old plants was isolated using the TRIzol™  
275 reagent (Invitrogen) and a Direct-zol RNA MiniPrep Kit (Zymo Research). The RNA was then  
276 cleaned with Turbo™ DNase (Invitrogen) according to the provided protocol. Reverse  
277 transcription reaction was performed with Superscript™ III Reverse Transcriptase (Invitrogen)  
278 and oligo-dT primer. qPCR was performed with Power SYBR™ Green PCR Master Mix (Applied  
279 Biosystems) using a QuantStudio™ 7 Flex Real-Time PCR System (Applied Biosystems). The

280 expression levels were calculated with the  $2^{-\Delta\Delta Ct}$  method. The Mann-Whitney U test was used  
281 for statistical analyses.

## 282 **Chromatin Immunoprecipitation**

283 Chromatin immunoprecipitation was performed using nuclei isolated from crosslinked (1%  
284 formaldehyde) 21-day old leaves, as described in (Bowler, Benvenuto et al. 2004) with minor  
285 modifications. Sonic and IP buffer were prepared as described in (Kaufmann, Muino et al.  
286 2010). Chromatin was sonicated at 4°C with a Diagenode Bioruptor Plus at high intensity for  
287 30 min (30 s on/30 s off) to obtain 200-300 bp DNA fragment size. Antibodies against total  
288 RNA Pol II (Abcam ab817) were used with Dynabeads Protein G (Thermo Scientific). Protein–  
289 DNA complexes were eluted from the beads as described in (Rowley, Bohmdorfer et al. 2013)  
290 and DNA was purified using a column-based method. DNA libraries were obtained using  
291 MicroPlex Library Preparation Kit (Diagenode) and sequenced on HiSeq HO 125 SE (Fasteris).  
292 Reads were trimmed to 50bp and aligned to the Arabidopsis genome (TAIR10) using Bowtie  
293 (with parameters -M1 -n2) (Langmead, Trapnell et al. 2009). Duplicate reads were removed by  
294 SAMtools (Li, Handsaker et al. 2009). Remaining sequences were extended to 200bp according  
295 to ChIP fragment length. Plots of RNA Pol II distribution were made using ngs.plot software  
296 (Shen, Shao et al. 2014). Genomic coordinates of *MIR* genes were taken from mirEX<sup>2</sup> data base  
297 (Zielezinski, Dolata et al. 2015).

## 298 ***In situ* immunolocalization of DRB1 and RNA polymerase II**

299 The double immunodetection experiments were performed according to the protocol  
300 described in (Bhat, Bielewicz et al. 2019). For HYL1 localization primary rabbit antibodies  
301 (Agrisera, AS06 136) diluted to 1:200 were used. After the double labeling assay, the slides  
302 were stained for DNA detection with Hoechst 33342 (Life Technology, USA) and mounted in  
303 ProLong Gold antifade reagent (Life Technologies).

## 304 **Co-immunoprecipitation of partner proteins of DRB1**

305 For each co-immunoprecipitation (co-IP), nuclear extract was prepared like described above.  
306 Proteins were extracted from nuclear pellet by resuspending it in nuclear lysis buffer (10%  
307 sucrose, 100mM Tris–HCl, pH 7.5, 5mM EDTA, 5mM EGTA, 300mM NaCl, 0.75% Triton X-100,  
308 0.15% sodium dodecyl sulphate (SDS), 1mM dithiothreitol (DTT), and 1x cComplete™ EDTA-free  
309 protease inhibitor (Roche)) and sonicated 2 cycle x 30 second ON/ 30 second OFF using

310 Bioruptor® Plus (Diagenode). After removal of cell debris by centrifugation (5 min, 16000g, 4  
311 °C) the cleared supernatants were diluted 1 time using water containing 1x cComplete™ EDTA-  
312 free protease inhibitor (Roche). Protein extract was incubated overnight with anti-HA  
313 antibodies (Roche). After over-night incubation, Dynabeads with protein G were added and  
314 samples were incubated for 1h. After incubation, beads were washed 2 times with low salt  
315 buffer (20mM Tris-HCl pH 8, 2mM EDTA, 150mM NaCl, 1% Triton X-100, 0.1% SDS), 1 time  
316 with high salt buffer (20mM Tris-HCl pH 8, 2mM EDTA, 500mM NaCl, 1% Triton X-100, 0.1%  
317 SDS), 1 time LiCl buffer (10mM Tris-HCl pH 8, 1mM EDTA, 250mM LiCl, 1% NP40, 0.1% SDS,  
318 1% sodium deoxycholate) and twice with TE (100mM Tris-HCl pH 8, 1mM EDTA). Beads  
319 containing proteins were analyzed by mass spectrometry. Control IPs were performed in Col-  
320 0 using anti-HA antibodies.

321 Mass spectrometry analyses were performed by IBB PAS, Warsaw. Magnetic beads  
322 containing proteins were suspended in 100 mM ammonium bicarbonate buffer, reduced using  
323 100 mM DTT for 30 min at 57 °C and alkylated in 50 mM iodoacetamide for 45 min at RT in the  
324 dark. In the next step proteins were digested overnight using 100 ng/μl trypsin (Promega) at  
325 37°C. Peptide mixtures were separated using Nano-Ultra Performance Liquid Chromatography  
326 coupled to Orbitrap Velos mass spectrometer (Thermo). Peptides were identified with Mascot  
327 algorithm (Matrix Science, London, UK) and searched against the TAIR10 database. The total  
328 number of MS/MS fragmentation spectra was used to quantify each protein from at least  
329 three independent biological replicates. Biological replicates consisted of plants of the same  
330 genotype grown at different dates and in different growth chambers. For the statistical  
331 analysis we compared the data from three independent experiments for pDRB1:DRB1:HA.  
332 Statistical analysis was performed with DESeq2 R-package (Love, Huber et al. 2014).

### 333 **Analysis of RNA-seq data**

334 RNA-seq data from wild type, *hyl1-2* and *se-3* was downloaded from published dataset under  
335 the accession number ERP001616 (Manavella, Hagmann et al. 2012). Raw reads were trimmed  
336 (first 20 nucleotides) with FASTX-Toolkit, adapters were removed using Trimmomatic and  
337 rRNA sequences were removed with Bowtie (Langmead, Trapnell et al. 2009, Bolger, Lohse  
338 et al. 2014). Clean reads were aligned to the Arabidopsis TAIR10 reference genome using  
339 HISAT2 (Kim, Langmead et al. 2015). The overall alignment rate was 98-99% for each sample.  
340 Next, prepDE.py script was used to extract count information from StringTie output and

341 DESeq2 R package was used to find differentially expressed genes (Love, Huber et al. 2014).  
342 Gene ontology was performed with clusterProfiler R package (Yu, Wang et al. 2012).

### 343 **Acknowledgments**

344 This work was funded by the National Center of Sciences (NCN); Preludium grant UMO-  
345 2011/03/N/NZ2/03147; Sonata grant UMO-2016/23/D/NZ1/00152 and the KNOW RNA  
346 Research Centre in Poznan (01KNOW2/2014).

### 347 **Conflict of Interest Statements**

348 The authors declare no conflict of interest.

349 **Figure 1. DRB1 is a positive factor for transcription of *MIR* genes. a)** Images show GUS  
350 staining of seedlings reporter lines in wild type (left), *hyl1-2* (middle) and *hyl1-2/dcl1-13*  
351 (right) backgrounds. **b)** RT- qPCR analysis of GUS transcript and pri-miRNA levels in the  
352 reporter lines in wild type and *hyl1-2* and *hyl1-2/dcl1-13* backgrounds. Error bars indicate SD  
353 (n=3).

354 **Figure 2. DRB1 colocalizes with RNA polymerase II in wild type plants: a)** Nuclei from fixed  
355 cells where DRB1 is shown in red, RNA Pol II in green and DNA in blue. The merge column  
356 shows all 3 channels. **b)** Colocalization scores of DRB1 and RNA Pol II calculated by three  
357 different approaches (Pearson, Spearman and LiQ).

358 **Figure 3. DRB1 interacts with transcriptional factors and is important for proper**  
359 **distribution of RNA polymerase II along *MIR* genes: a)** The DRB1 interactome determined  
360 by co-immunoprecipitation followed by Mass Spectrometry **b)** The occupancy of total RNA  
361 Pol II at promoter regions on different *MIR* genes (~200 bp upstream of TSS). **c)** The  
362 occupancy of total RNA Pol II at the *MIR393A* or *MIR393B* loci using CHIP followed by qPCR.  
363 The region marked with an asterisk represents the statistically significant enrichment of RNA  
364 Pol II in *hyl1-2* as compared to wild-type plants. Schematic gene structure is shown, and red  
365 lines show the amplified regions. Error bars represent the SD of three independent biological

366 replicates.

367 **Figure 4. Downregulation of RNA Pol II transcripts in DRB1 mutant. a)** MAplot showing the  
368 DEGs in *hyl1-2* mutant as compared to wild type. Red color indicates the statistically  
369 significant genes **b)** Venn diagram showing the overlap of DEGs between *hyl1-2* and *se-3*  
370 mutants. **c)** Gene ontology analysis performed on 769 genes which are downregulated in  
371 *hyl1-2* mutant and not changed in *se-3* mutant plants.

372 **Figure S1. HYL1 stimulates transcription from MIR genes.** Analysis of *hyl1-2/dcl1-13*  
373 transgenic lines. RT-qPCR analysis of levels of 6 pri-miRNAs in wild type, *hyl1-2* and four  
374 independent *hyl1-2/dcl1-13* transgenic lines (left). Error bars indicate SD (n=3). Northern blot  
375 analysis of mature microRNA levels in wild type, *hyl1-2* and four independent *hyl1-2/dcl1-13*  
376 transgenic lines (right). U6 serves as a positive control for northern blot hybridization

377 **Figure S2. DRB1 colocalizes with RNA polymerase II in *se-2* mutant plants: a)** Nuclei from  
378 fixed cells where DRB1 is shown in red, RNA Pol II in green and DNA in blue. The merge  
379 column shows all 3 channels. **b)** Colocalization scores of DRB1 and RNA Pol II calculated by  
380 three different approaches (Pearson, Spearman and LiQ).

381 **Figure S3. Gene ontology analysis of genes downregulated in *hyl1-2* mutant in comparison**  
382 **to wild type plants.**

383

Fig. 1

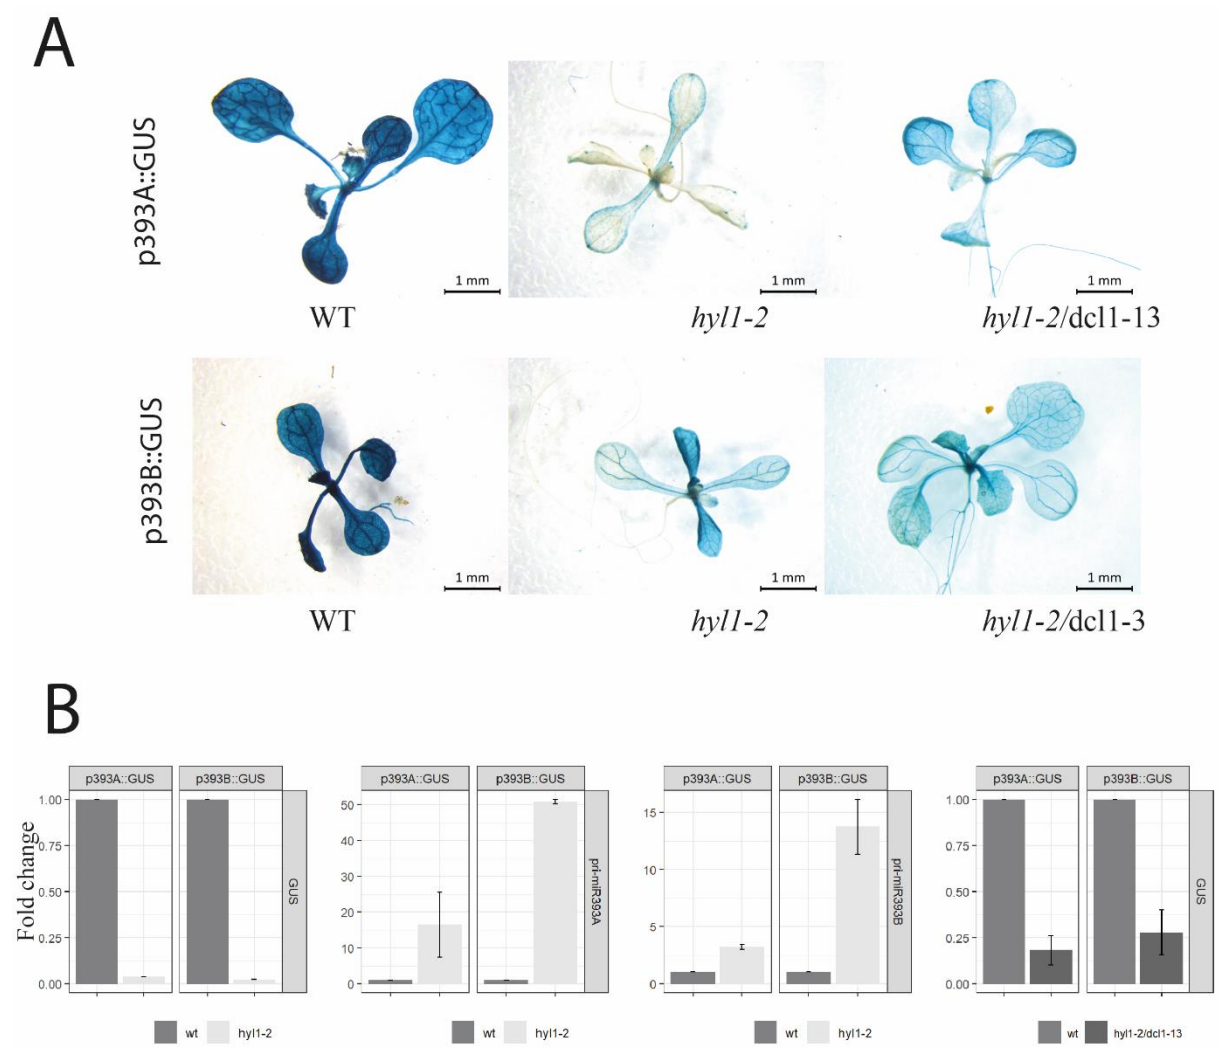

Fig. 2

A

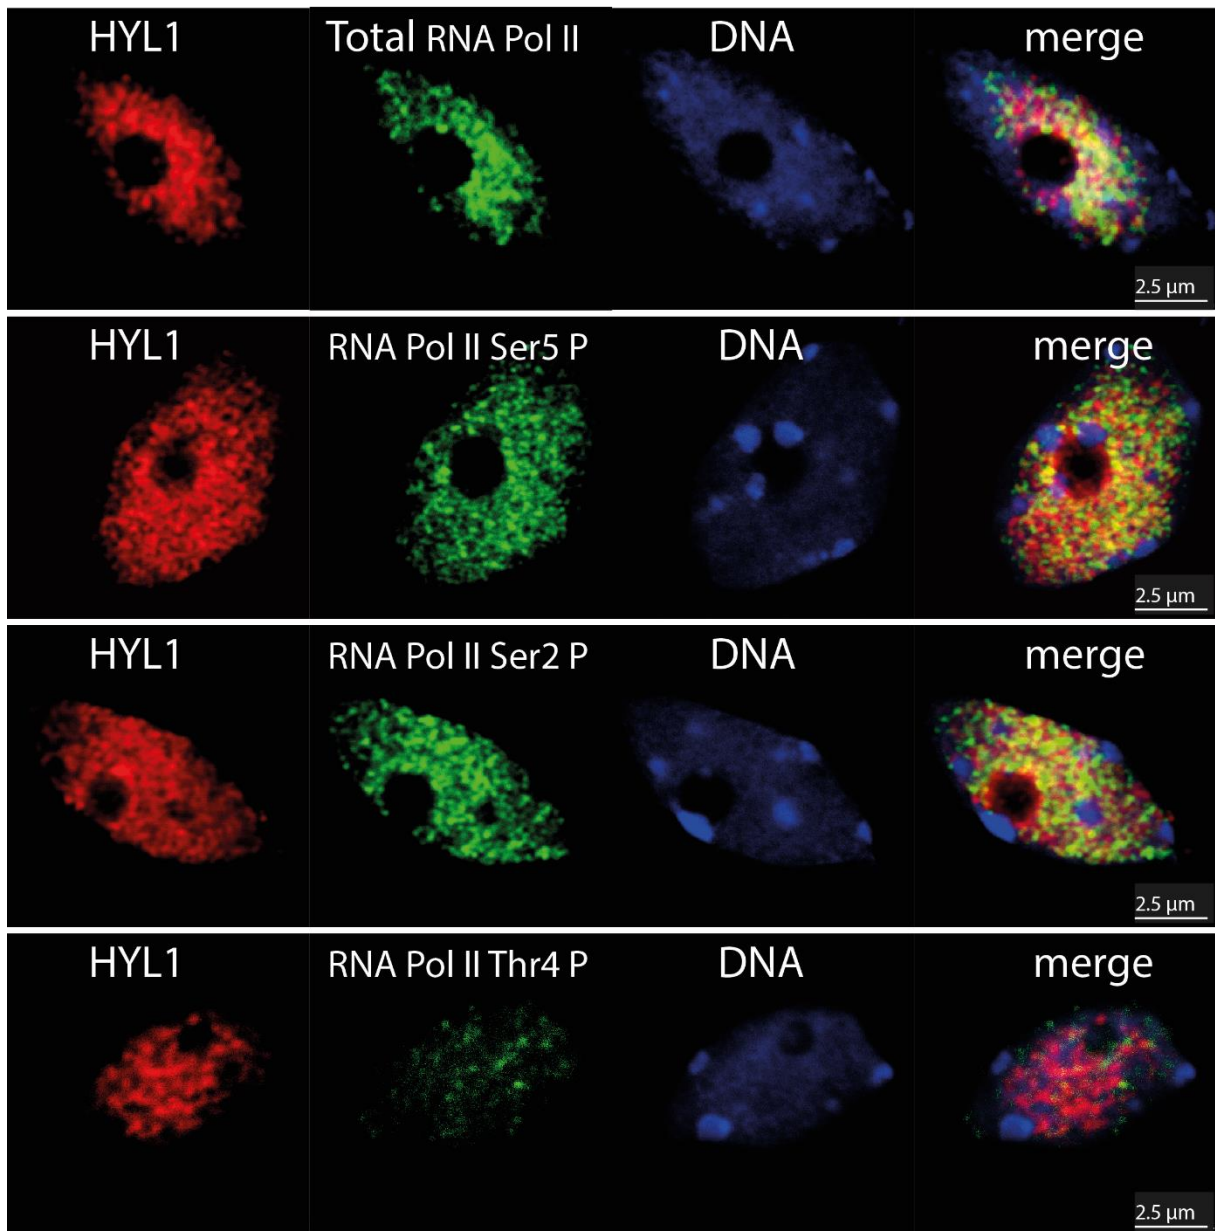

B

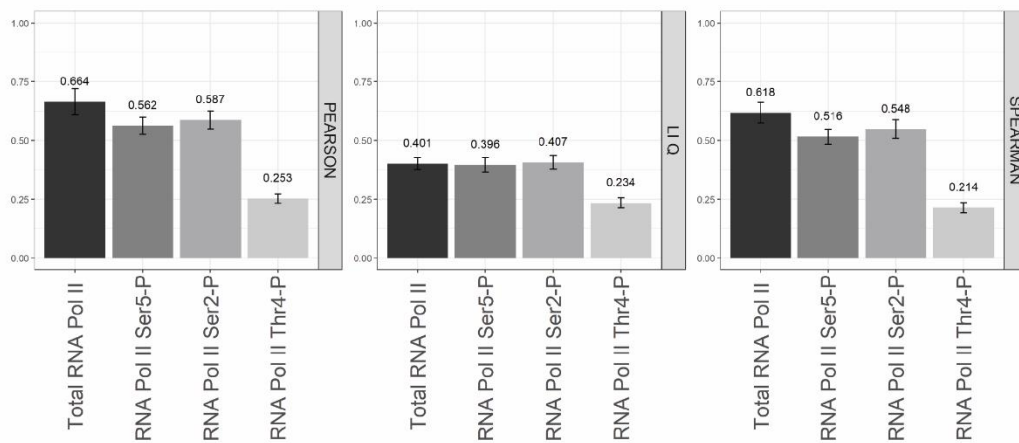

Fig. 3

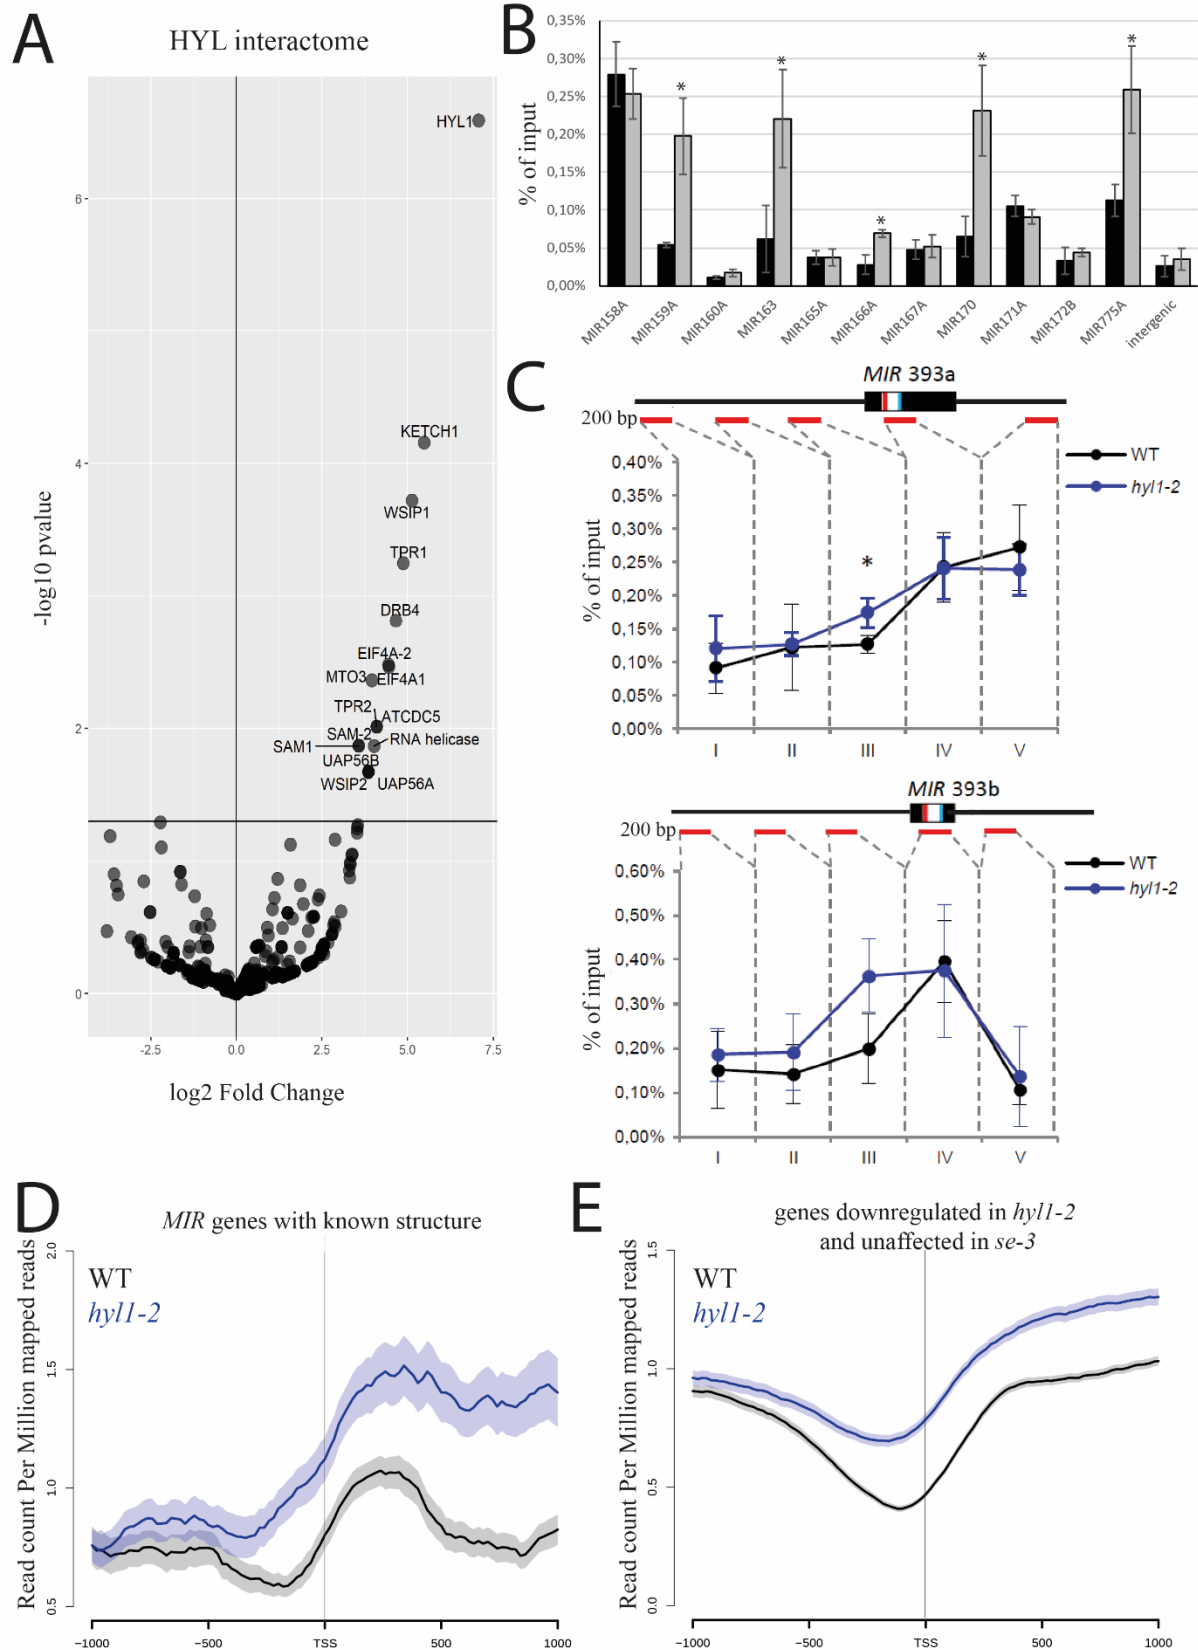



Fig. 4

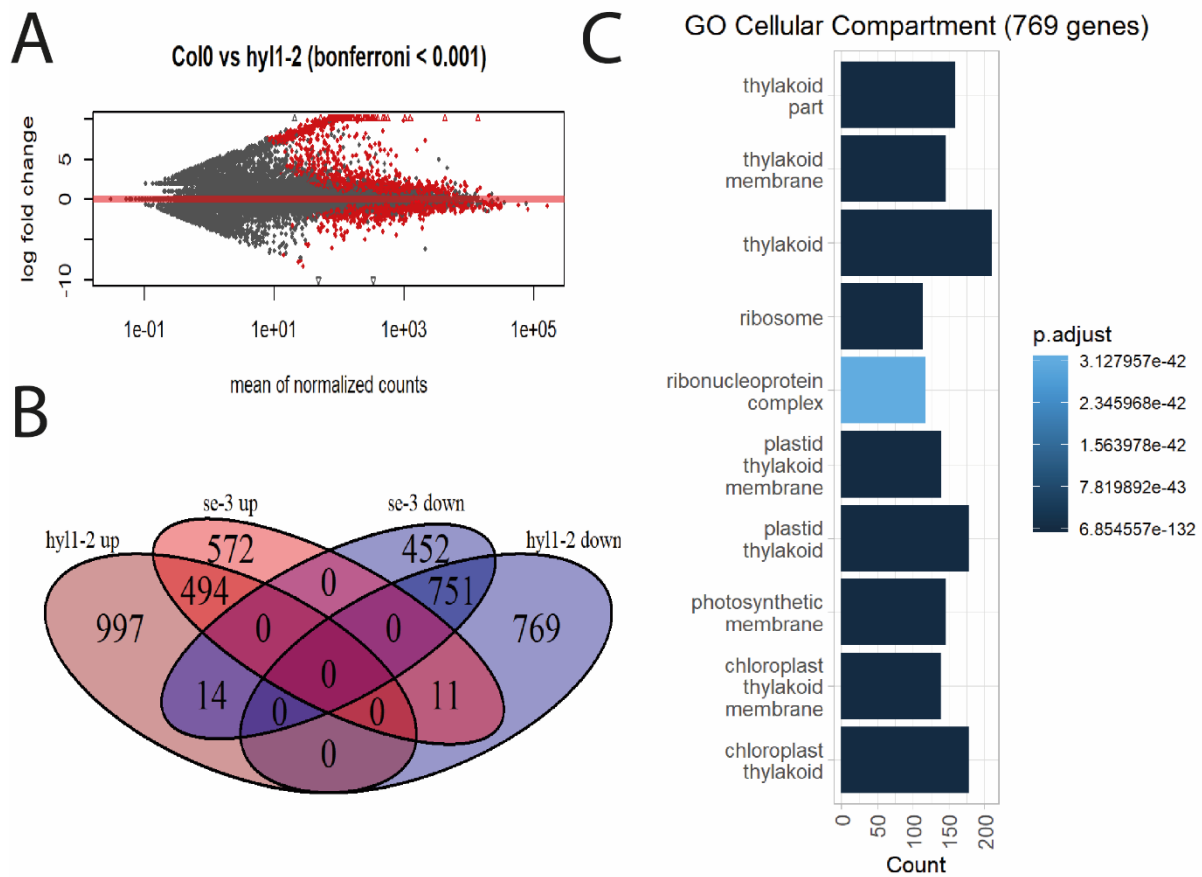

Fig. S1

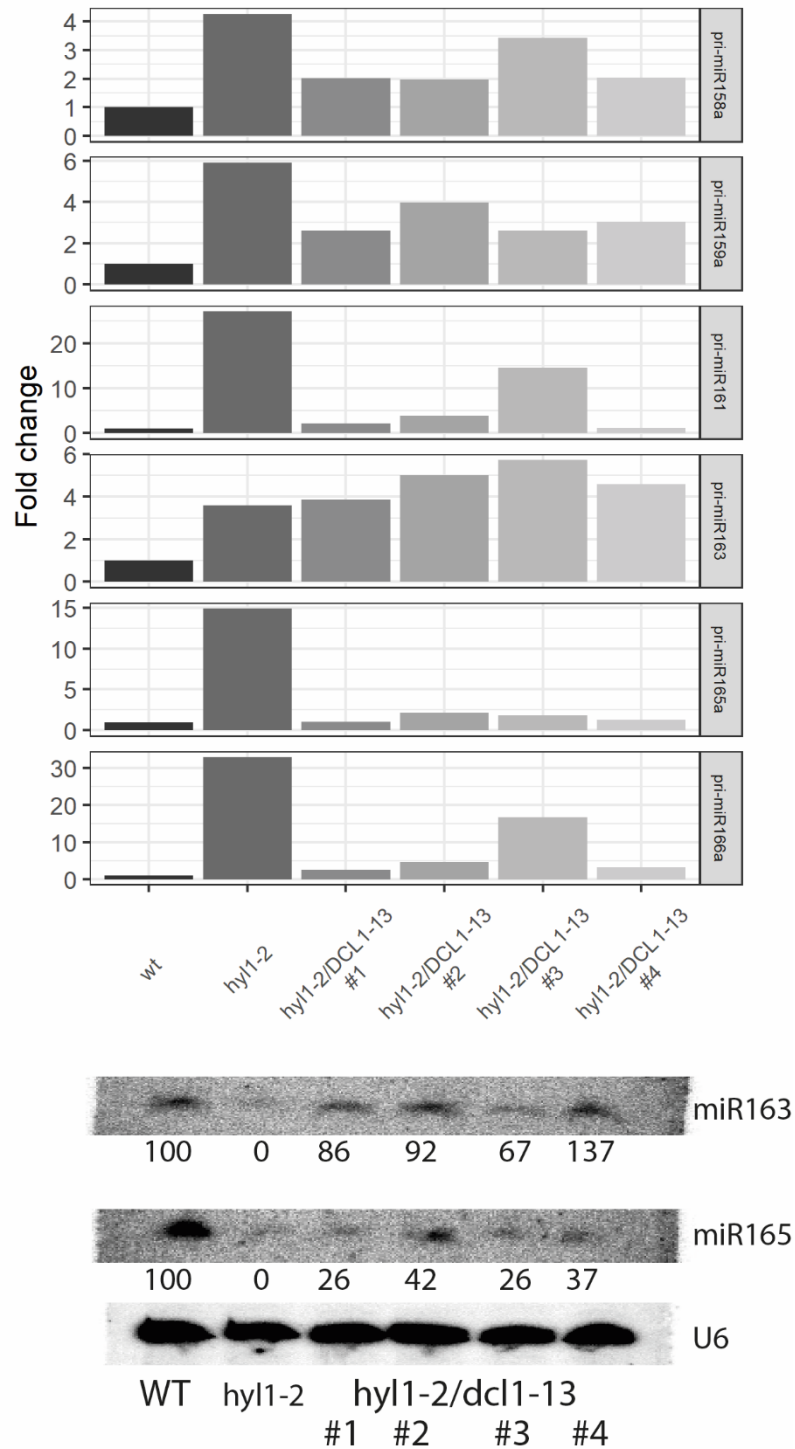

Fig. S2

A

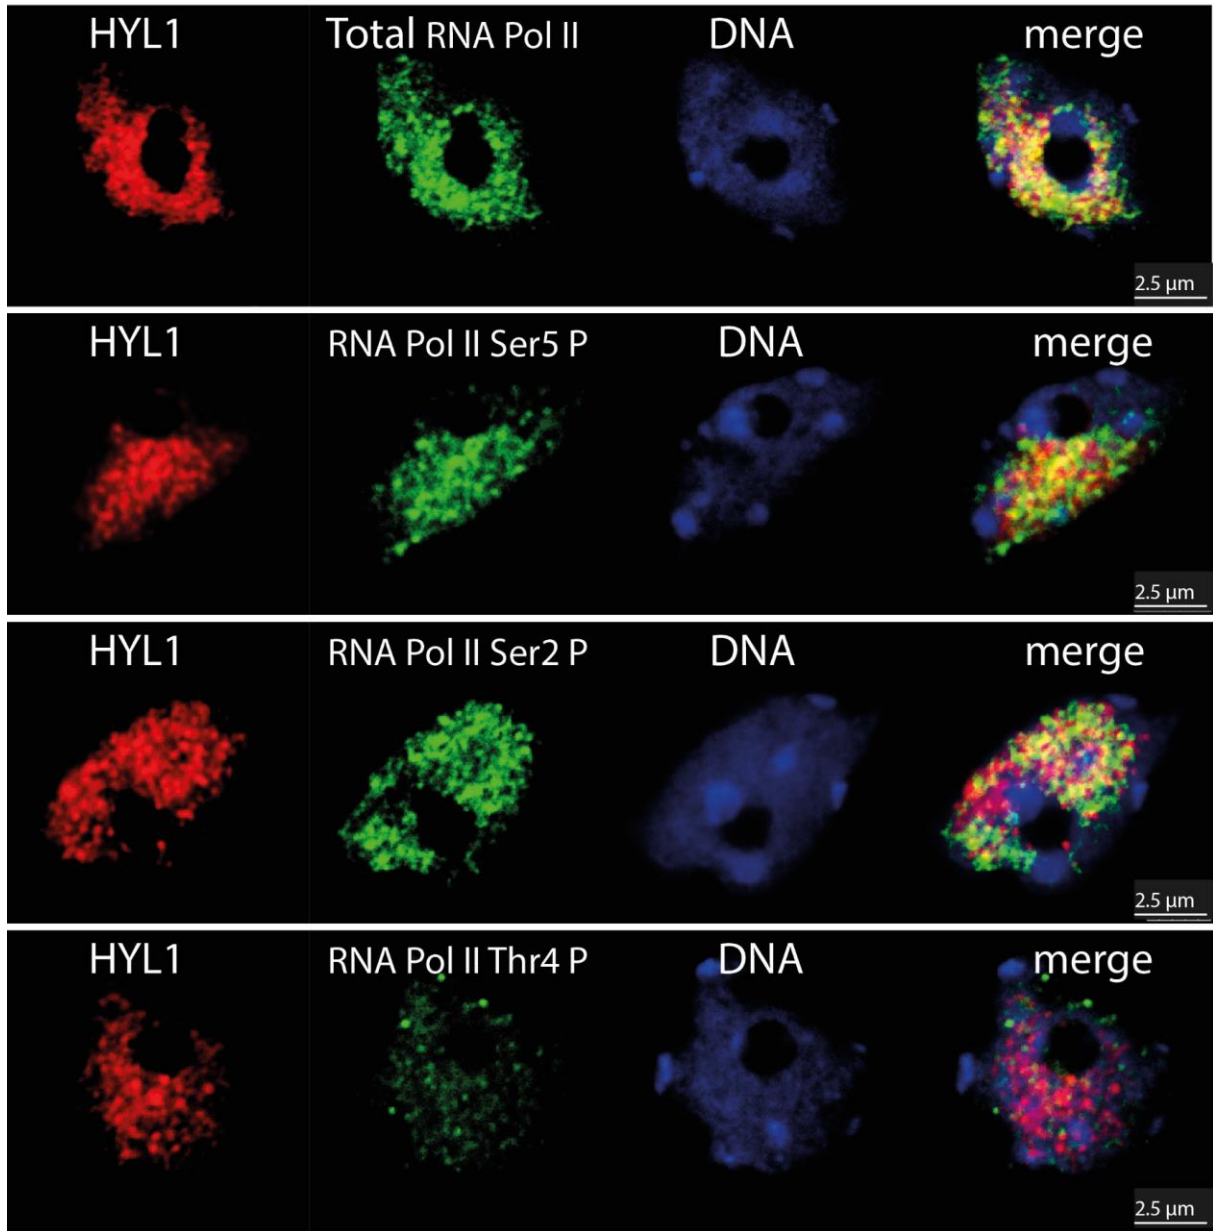

B

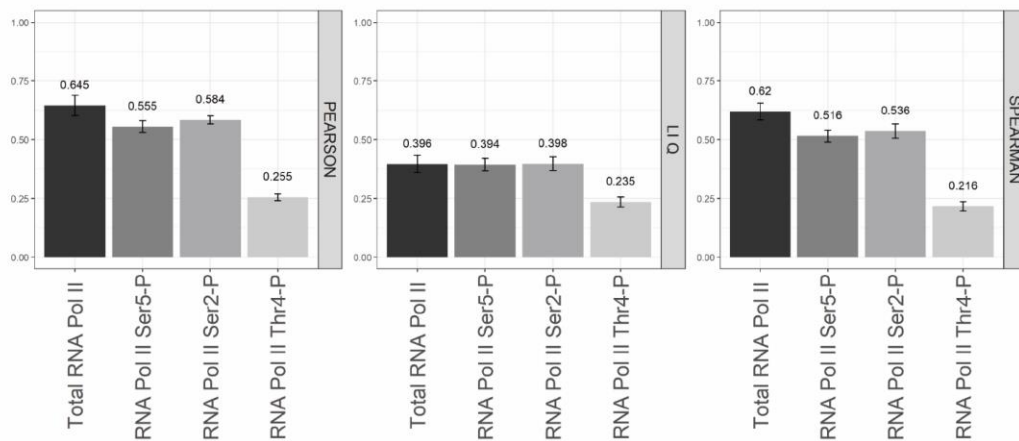

Fig. S3

A

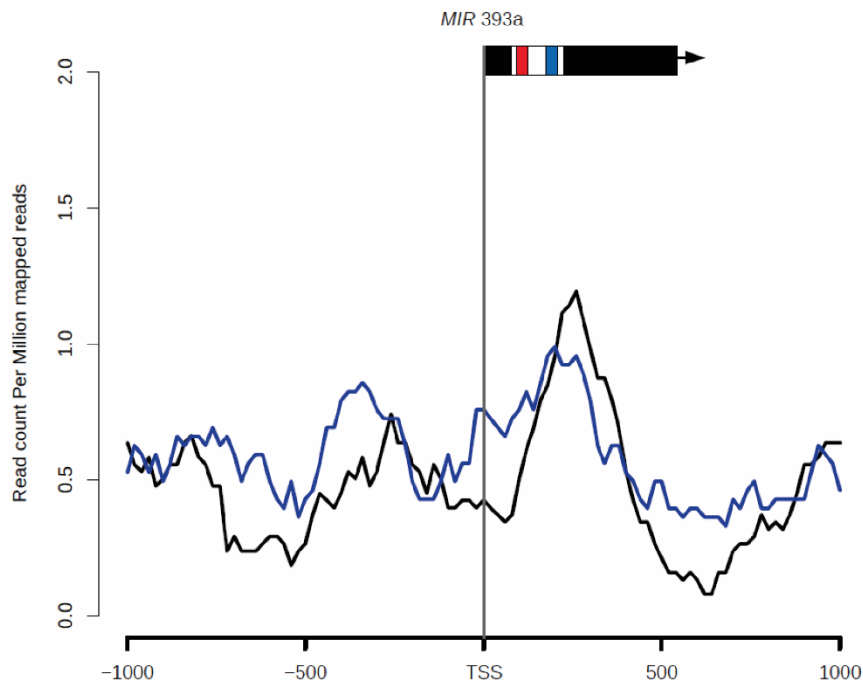

B

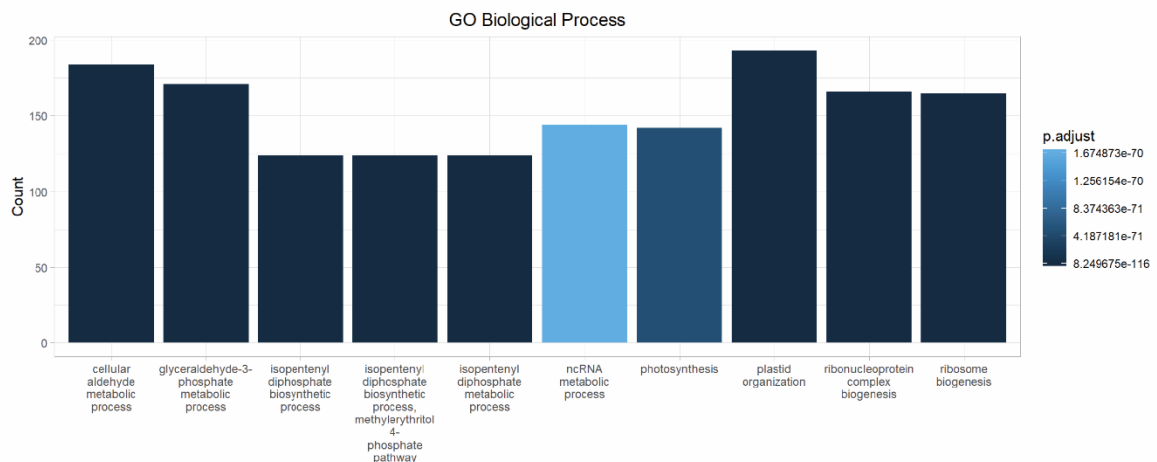

## References

- 384 Achkar, N. P., S. K. Cho, C. Poulsen, A. L. Arce, D. A. Re, A. J. Giudicatti, E. Karayekov, M. Y. Ryu, S. W.  
385 Choi, J. Harholt, J. J. Casal, S. W. Yang and P. A. Manavella (2018). "A Quick HYL1-Dependent  
386 Reactivation of MicroRNA Production Is Required for a Proper Developmental Response after  
387 Extended Periods of Light Deprivation." *Developmental Cell* **46**(2): 236-247.e236.  
388 Barciszewska-Pacak, M., K. Milanowska, K. Knop, D. Bielewicz, P. Nuc, P. Plewka, A. M. Pacak, F.  
389 Vazquez, W. Karlowski, A. Jarmolowski and Z. Szweykowska-Kulinska (2015). "Arabidopsis microRNA  
390 expression regulation in a wide range of abiotic stress responses." *Front Plant Sci* **6**: 410.  
391 Bartel, D. P. (2004). "MicroRNAs: Genomics, Biogenesis, Mechanism, and Function." *Cell* **116**(2): 281-  
392 297.

393 Bauren, G. and L. Wieslander (1994). "Splicing of Balbiani ring 1 gene pre-mRNA occurs  
394 simultaneously with transcription." *Cell* **76**(1): 183-192.

395 Bhagat, P. K., D. Verma, R. Badmi and A. K. Sinha (2018). "Dynamic regulation of HYL1 provides new  
396 insights into its multifaceted role in Arabidopsis." *bioRxiv*.

397 Bhat, S. S., D. Bielewicz, N. Grzelak, T. Gulanicz, Z. Bodi, L. Szewc, M. Bajczyk, J. Dolata, D. J. Smolinski,  
398 R. G. Fray, A. Jarmolowski and Z. Szweykowska-Kulinska (2019). "mRNA adenosine methylase (MTA)  
399 deposits m6A on pri-miRNAs to modulate miRNA biogenesis in Arabidopsis thaliana." *bioRxiv*.

400 Bielewicz, D., J. Dolata, A. Zielezinski, S. Alaba, B. Szarzynska, M. W. Szczesniak, A. Jarmolowski, Z.  
401 Szweykowska-Kulinska and W. M. Karlowski (2012). "mirEX: a platform for comparative exploration  
402 of plant pri-miRNA expression data." *Nucleic Acids Res* **40**(Database issue): D191-197.

403 Bielewicz, D., M. Kalak, M. Kalyna, D. Windels, A. Barta, F. Vazquez, Z. Szweykowska-Kulinska and A.  
404 Jarmolowski (2013). "Introns of plant pri-miRNAs enhance miRNA biogenesis." *EMBO Rep* **14**(7): 622-  
405 628.

406 Bolger, A. M., M. Lohse and B. Usadel (2014). "Trimmomatic: a flexible trimmer for Illumina sequence  
407 data." *Bioinformatics* **30**(15): 2114-2120.

408 Bologna, N. G., J. L. Mateos, E. G. Bresso and J. F. Palatnik (2009). "A loop-to-base processing  
409 mechanism underlies the biogenesis of plant microRNAs miR319 and miR159." *EMBO J* **28**(23): 3646-  
410 3656.

411 Bowler, C., G. Benvenuto, P. Laflamme, D. Molino, A. V. Probst, M. Tariq and J. Paszkowski (2004).  
412 "Chromatin techniques for plant cells." *Plant J* **39**(5): 776-789.

413 Burdisso, P., F. Milia, A. L. Schapire, N. G. Bologna, J. F. Palatnik and R. M. Rasia (2014). "Structural  
414 determinants of Arabidopsis thaliana Hyponastic leaves 1 function in vivo." *PLoS One* **9**(11): e113243.

415 Chen, X. (2004). "A microRNA as a translational repressor of APETALA2 in Arabidopsis flower  
416 development." *Science* **303**(5666): 2022-2025.

417 Chendrimada, T. P., R. I. Gregory, E. Kumaraswamy, J. Norman, N. Cooch, K. Nishikura and R.  
418 Shiekhattar (2005). "TRBP recruits the Dicer complex to Ago2 for microRNA processing and gene  
419 silencing." *Nature* **436**(7051): 740-744.

420 Cho, S. K., S. Ben Chaabane, P. Shah, C. P. Poulsen and S. W. Yang (2014). "COP1 E3 ligase protects  
421 HYL1 to retain microRNA biogenesis." *Nature Communications* **5**: 5867.

422 Clough, S. J. and A. F. Bent (1998). "Floral dip: a simplified method for Agrobacterium-mediated  
423 transformation of Arabidopsis thaliana." *Plant J* **16**(6): 735-743.

424 Dolata, J., M. Taube, M. Bajczyk, A. Jarmolowski, Z. Szweykowska-Kulinska and D. Bielewicz (2018).  
425 "Regulation of Plant Microprocessor Function in Shaping microRNA Landscape." *Front Plant Sci* **9**:  
426 753.

427 Dong, Z., M. H. Han and N. Fedoroff (2008). "The RNA-binding proteins HYL1 and SE promote  
428 accurate in vitro processing of pri-miRNA by DCL1." *Proc Natl Acad Sci U S A* **105**(29): 9970-9975.

429 Earley, K. W., J. R. Haag, O. Pontes, K. Opper, T. Juehne, K. Song and C. S. Pikaard (2006). "Gateway-  
430 compatible vectors for plant functional genomics and proteomics." *Plant J* **45**(4): 616-629.

431 Fang, X., Y. Cui, Y. Li and Y. Qi (2015). "Transcription and processing of primary microRNAs are  
432 coupled by Elongator complex in Arabidopsis." *Nat Plants* **1**: 15075.

433 Fang, Y. and D. L. Spector (2007). "Identification of nuclear dicing bodies containing proteins for  
434 microRNA biogenesis in living Arabidopsis plants." *Curr Biol* **17**(9): 818-823.

435 Gregory, R. I., K. P. Yan, G. Amuthan, T. Chendrimada, B. Doratotaj, N. Cooch and R. Shiekhattar  
436 (2004). "The Microprocessor complex mediates the genesis of microRNAs." *Nature* **432**(7014): 235-  
437 240.

438 Gromak, N., M. Dienstbier, S. Macias, M. Plass, E. Eyra, J. F. Caceres and N. J. Proudfoot (2013).  
439 "Drosha regulates gene expression independently of RNA cleavage function." *Cell Rep* **5**(6): 1499-  
440 1510.

441 Haase, A. D., L. Jaskiewicz, H. Zhang, S. Laine, R. Sack, A. Gatignol and W. Filipowicz (2005). "TRBP, a  
442 regulator of cellular PKR and HIV-1 virus expression, interacts with Dicer and functions in RNA  
443 silencing." *EMBO Rep* **6**(10): 961-967.

444 Han, J., Y. Lee, K. H. Yeom, Y. K. Kim, H. Jin and V. N. Kim (2004). "The Drosha-DGCR8 complex in  
445 primary microRNA processing." *Genes Dev* **18**(24): 3016-3027.

446 Hintermair, C., M. Heidemann, F. Koch, N. Descostes, M. Gut, I. Gut, R. Fenouil, P. Ferrier, A. Flatley,  
447 E. Kremmer, R. D. Chapman, J. C. Andrau and D. Eick (2012). "Threonine-4 of mammalian RNA  
448 polymerase II CTD is targeted by Polo-like kinase 3 and required for transcriptional elongation."  
449 *EMBO J* **31**(12): 2784-2797.

450 Kaufmann, K., J. M. Muino, M. Osteras, L. Farinelli, P. Krajewski and G. C. Angenent (2010).  
451 "Chromatin immunoprecipitation (ChIP) of plant transcription factors followed by sequencing (ChIP-  
452 SEQ) or hybridization to whole genome arrays (ChIP-CHIP)." *Nat Protoc* **5**(3): 457-472.

453 Kim, D., B. Langmead and S. L. Salzberg (2015). "HISAT: a fast spliced aligner with low memory  
454 requirements." *Nat Methods* **12**(4): 357-360.

455 Knop, K., A. Stepien, M. Barciszewska-Pacak, M. Taube, D. Bielewicz, M. Michalak, J. W. Borst, A.  
456 Jarmolowski and Z. Szweykowska-Kulinska (2017). "Active 5' splice sites regulate the biogenesis  
457 efficiency of Arabidopsis microRNAs derived from intron-containing genes." *Nucleic Acids Res* **45**(5):  
458 2757-2775.

459 Koiwa, H., S. Hausmann, W. Y. Bang, A. Ueda, N. Kondo, A. Hiraguri, T. Fukuhara, J. D. Bahk, D. J. Yun,  
460 R. A. Bressan, P. M. Hasegawa and S. Shuman (2004). "Arabidopsis C-terminal domain phosphatase-  
461 like 1 and 2 are essential Ser-5-specific C-terminal domain phosphatases." *Proc Natl Acad Sci U S A*  
462 **101**(40): 14539-14544.

463 Komarnitsky, P., E. J. Cho and S. Buratowski (2000). "Different phosphorylated forms of RNA  
464 polymerase II and associated mRNA processing factors during transcription." *Genes Dev* **14**(19):  
465 2452-2460.

466 Kruszka, K., M. Pieczynski, D. Windels, D. Bielewicz, A. Jarmolowski, Z. Szweykowska-Kulinska and F.  
467 Vazquez (2012). "Role of microRNAs and other sRNAs of plants in their changing environments." *J*  
468 *Plant Physiol* **169**(16): 1664-1672.

469 Kurihara, Y., Y. Takashi and Y. Watanabe (2006). "The interaction between DCL1 and HYL1 is  
470 important for efficient and precise processing of pri-miRNA in plant microRNA biogenesis." *RNA*  
471 **12**(2): 206-212.

472 Kurihara, Y. and Y. Watanabe (2004). "Arabidopsis micro-RNA biogenesis through Dicer-like 1 protein  
473 functions." *Proc Natl Acad Sci U S A* **101**(34): 12753-12758.

474 Langmead, B., C. Trapnell, M. Pop and S. L. Salzberg (2009). "Ultrafast and memory-efficient  
475 alignment of short DNA sequences to the human genome." *Genome Biol* **10**(3): R25.

476 Laubinger, S., T. Sachsenberg, G. Zeller, W. Busch, J. U. Lohmann, G. Ratsch and D. Weigel (2008).  
477 "Dual roles of the nuclear cap-binding complex and SERRATE in pre-mRNA splicing and microRNA  
478 processing in Arabidopsis thaliana." *Proc Natl Acad Sci U S A* **105**(25): 8795-8800.

479 Li, H., B. Handsaker, A. Wysoker, T. Fennell, J. Ruan, N. Homer, G. Marth, G. Abecasis, R. Durbin and  
480 S. Genome Project Data Processing (2009). "The Sequence Alignment/Map format and SAMtools."  
481 *Bioinformatics* **25**(16): 2078-2079.

482 Li, S., Y. Wang, Y. Zhao, X. Zhao, X. Chen and Z. Gong (2019). "Global co-transcriptional splicing in  
483 Arabidopsis and the correlation with splicing regulation in mature RNAs." *Mol Plant*.

484 Love, M. I., W. Huber and S. Anders (2014). "Moderated estimation of fold change and dispersion for  
485 RNA-seq data with DESeq2." *Genome Biol* **15**(12): 550.

486 Lu, C. and N. Fedoroff (2000). "A mutation in the Arabidopsis HYL1 gene encoding a dsRNA binding  
487 protein affects responses to abscisic acid, auxin, and cytokinin." *Plant Cell* **12**(12): 2351-2366.

488 Manavella, P. A., J. Hagmann, F. Ott, S. Laubinger, M. Franz, B. Macek and D. Weigel (2012). "Fast-  
489 forward genetics identifies plant CPL phosphatases as regulators of miRNA processing factor HYL1."  
490 *Cell* **151**(4): 859-870.

491 Mendoza, M. C., F. Du, N. Iranfar, N. Tang, H. Ma, W. F. Loomis and R. A. Firtel (2005). "Loss of SMEK,  
492 a novel, conserved protein, suppresses MEK1 null cell polarity, chemotaxis, and gene expression  
493 defects." *Mol Cell Biol* **25**(17): 7839-7853.

494 Nojima, T., K. Rebelo, T. Gomes, A. R. Grosso, N. J. Proudfoot and M. Carmo-Fonseca (2018). "RNA  
495 Polymerase II Phosphorylated on CTD Serine 5 Interacts with the Spliceosome during Co-  
496 transcriptional Splicing." *Mol Cell* **72**(2): 369-379 e364.

497 Palatnik, J. F., E. Allen, X. Wu, C. Schommer, R. Schwab, J. C. Carrington and D. Weigel (2003).  
498 "Control of leaf morphogenesis by microRNAs." *Nature* **425**(6955): 257-263.

499 Park, W., J. Li, R. Song, J. Messing and X. Chen (2002). "CARPEL FACTORY, a Dicer homolog, and HEN1,  
500 a novel protein, act in microRNA metabolism in Arabidopsis thaliana." *Curr Biol* **12**(17): 1484-1495.

501 Paroo, Z., X. Ye, S. Chen and Q. Liu (2009). "Phosphorylation of the human microRNA-generating  
502 complex mediates MAPK/Erk signaling." *Cell* **139**(1): 112-122.

503 Parry, G., L. I. Calderon-Villalobos, M. Prigge, B. Peret, S. Dharmasiri, H. Itoh, E. Lechner, W. M. Gray,  
504 M. Bennett and M. Estelle (2009). "Complex regulation of the TIR1/AFB family of auxin receptors."  
505 *Proc Natl Acad Sci U S A* **106**(52): 22540-22545.

506 Raczynska, K. D., A. Stepien, D. Kierzkowski, M. Kalak, M. Bajczyk, J. McNicol, C. G. Simpson, Z.  
507 Szweykowska-Kulinska, J. W. Brown and A. Jarmolowski (2014). "The SERRATE protein is involved in  
508 alternative splicing in Arabidopsis thaliana." *Nucleic Acids Res* **42**(2): 1224-1244.

509 Raghuram, B., A. H. Sheikh, Y. Rustagi and A. K. Sinha (2015). "MicroRNA biogenesis factor DRB1 is a  
510 phosphorylation target of mitogen activated protein kinase MPK3 in both rice and Arabidopsis." *FEBS*  
511 *J* **282**(3): 521-536.

512 Reinhart, B. J., E. G. Weinstein, M. W. Rhoades, B. Bartel and D. P. Bartel (2002). "MicroRNAs in  
513 plants." *Genes Dev* **16**(13): 1616-1626.

514 Rowley, M. J., G. Bohmdorfer and A. T. Wierzbicki (2013). "Analysis of long non-coding RNAs  
515 produced by a specialized RNA polymerase in Arabidopsis thaliana." *Methods* **63**(2): 160-169.

516 Sacnun, J. M., R. Crespo, J. Palatnik, R. Rasia and N. González-Schain (2019). "Dual function of  
517 HYPONASTIC LEAVES 1 during early skotomorphogenic growth  
518 3 in Arabidopsis." *bioRxiv*.

519 Schwab, R., C. Speth, S. Laubinger and O. Voinnet (2013). "Enhanced microRNA accumulation  
520 through stemloop-adjacent introns." *EMBO Rep* **14**(7): 615-621.

521 Shen, L., N. Shao, X. Liu and E. Nestler (2014). "ngs.plot: Quick mining and visualization of next-  
522 generation sequencing data by integrating genomic databases." *BMC Genomics* **15**: 284.

523 Speth, C., E. X. Szabo, C. Martinho, S. Collani, S. Zur Oven-Krockhaus, S. Richter, I. Droste-Borel, B.  
524 Macek, Y. D. Stierhof, M. Schmid, C. Liu and S. Laubinger (2018). "Arabidopsis RNA processing factor  
525 SERRATE regulates the transcription of intronless genes." *Elife* **7**.

526 Su, C., Z. Li, J. Cheng, L. Li, S. Zhong, L. Liu, Y. Zheng and B. Zheng (2017). "The Protein Phosphatase 4  
527 and SMEK1 Complex Dephosphorylates HYL1 to Promote miRNA Biogenesis by Antagonizing the  
528 MAPK Cascade in Arabidopsis." *Dev Cell* **41**(5): 527-539 e525.

529 Szarynska, B., L. Sobkowiak, B. D. Pant, S. Balazadeh, W. R. Scheible, B. Mueller-Roeber, A.  
530 Jarmolowski and Z. Szweykowska-Kulinska (2009). "Gene structures and processing of Arabidopsis  
531 thaliana HYL1-dependent pri-miRNAs." *Nucleic Acids Res* **37**(9): 3083-3093.

532 Tagami, Y., H. Motose and Y. Watanabe (2009). "A dominant mutation in DCL1 suppresses the hyl1  
533 mutant phenotype by promoting the processing of miRNA." *RNA* **15**(3): 450-458.

534 Vazquez, F., V. Gascioli, P. Crete and H. Vaucheret (2004). "The nuclear dsRNA binding protein HYL1  
535 is required for microRNA accumulation and plant development, but not posttranscriptional transgene  
536 silencing." *Curr Biol* **14**(4): 346-351.

537 Xie, Z., E. Allen, N. Fahlgren, A. Calamar, S. A. Givan and J. C. Carrington (2005). "Expression of  
538 Arabidopsis MIRNA genes." *Plant Physiol* **138**(4): 2145-2154.

539 Yan, J., P. Wang, B. Wang, C. C. Hsu, K. Tang, H. Zhang, Y. J. Hou, Y. Zhao, Q. Wang, C. Zhao, X. Zhu, W.  
540 A. Tao, J. Li and J. K. Zhu (2017). "The SnRK2 kinases modulate miRNA accumulation in Arabidopsis."  
541 *PLoS Genet* **13**(4): e1006753.

542 Yang, L., Z. Liu, F. Lu, A. Dong and H. Huang (2006). "SERRATE is a novel nuclear regulator in primary  
543 microRNA processing in Arabidopsis." *Plant J* **47**(6): 841-850.

- 544 Yang, S. W., H. Y. Chen, J. Yang, S. Machida, N. H. Chua and Y. A. Yuan (2010). "Structure of  
545 Arabidopsis HYPONASTIC LEAVES1 and its molecular implications for miRNA processing." Structure  
546 **18**(5): 594-605.
- 547 Yang, X., W. Ren, Q. Zhao, P. Zhang, F. Wu and Y. He (2014). "Homodimerization of HYL1 ensures the  
548 correct selection of cleavage sites in primary miRNA." Nucleic Acids Res **42**(19): 12224-12236.
- 549 Yu, G., L. G. Wang, Y. Han and Q. Y. He (2012). "clusterProfiler: an R package for comparing biological  
550 themes among gene clusters." OMICS **16**(5): 284-287.
- 551 Zhang, S., M. Xie, G. Ren and B. Yu (2013). "CDC5, a DNA binding protein, positively regulates  
552 posttranscriptional processing and/or transcription of primary microRNA transcripts." Proc Natl Acad  
553 Sci U S A **110**(43): 17588-17593.
- 554 Zhang, Z., X. Guo, C. Ge, Z. Ma, M. Jiang, T. Li, H. Koiwa, S. W. Yang and X. Zhang (2017). "KETCH1  
555 imports HYL1 to nucleus for miRNA biogenesis in Arabidopsis." Proc Natl Acad Sci U S A **114**(15):  
556 4011-4016.
- 557 Zielezinski, A., J. Dolata, S. Alaba, K. Kruszka, A. Pacak, A. Swida-Barteczka, K. Knop, A. Stepien, D.  
558 Bielewicz, H. Pietrykowska, I. Sierocka, L. Sobkowiak, A. Lakomiak, A. Jarmolowski, Z. Szweykowska-  
559 Kulinska and W. M. Karlowski (2015). "mirEX 2.0 - an integrated environment for expression profiling  
560 of plant microRNAs." BMC Plant Biol **15**: 144.
